# Supplementary material for: Identification of the Novel Candidate Genes and Variants in Boar Liver Tissues with Divergent Skatole Levels Using RNA Deep Sequencing
Source: PLoS One. 2013 Aug 26;8(8):e72298. doi: 10.1371/journal.pone.0072298 (PMC3753299; doi:10.1371/journal.pone.0072298)
Supplement: Table S6 — GLM analysis results for liver DEGs. (XLS) [file pone.0072298.s006.xls]

## Sheet: Sheet1
mrna Id	gene Id	name	total Deviance	within Group	between Group	p Val	p Adj
XM_003353686.1	414411	ASS1	30.8854	5.94644	24.9389	5.91756083467843e-07	0.000269108
NM_001185130.1	100153506	PISD	18.8916	6.39167	12.4999	0.000406968	0.021334
NM_001044579.1	733646	LOC733646	16.728	4.93197	11.7961	0.000593559	0.0259427
XM_003355598.1	100157341	COPS7A	12.6717	1.79676	10.875	0.000974736	0.0342058
XM_003124410.1	100525688	LOC100525688	15.346	2.89143	12.4546	0.000416965	0.0213513
NM_001195321.1	100157521	ACSL5	18.0829	2.22491	15.858	6.82759056553905e-05	0.00629985
XM_003128105.1	100525292	LOC100525292	19.4709	2.20611	17.2648	3.25156546927552e-05	0.00405452
NM_001243644.1	100626761	AP2M1	19.3065	4.46484	14.8416	0.000116925	0.00954387
XM_003129821.2	100524886	GRIA4	12.7479	1.64663	11.1013	0.000862686	0.0315054
XM_003481568.1	100525991	LMBR1L	18.4471	5.61074	12.8363	0.000339951	0.0192672
XM_003482481.1	100519855	LOC100519855	14.6244	1.98907	12.6353	0.000378525	0.0203203
XM_003482919.1	100737161	LOC100737161	23.3772	3.71562	19.6616	9.24400121604663e-06	0.00159063
NM_001243369.1	100628074	RANGRF	19.1602	3.13878	16.0214	6.26292235305081e-05	0.00592187
XM_003360303.2	100620167	LOC100620167	27.5025	7.20496	20.2975	6.62856742039697e-06	0.00136135
XM_001925378.2	100151786	LOC100151786	13.8397	3.37646	10.4632	0.00121774	0.0388944
XM_003135207.2	100518105	LOC100518105	23.1841	7.58158	15.6025	7.81497178614643e-05	0.0071079
NM_213951.1	396994	NST	29.023	6.47797	22.545	2.05274151166002e-06	0.000633111
XM_003355245.1	100156038	LOC100156038	19.2955	5.44492	13.8505	0.00019794	0.0136317
XM_003128155.1	100522444	LOC100522444	13.6543	3.8379	9.81645	0.00172958	0.0485809
XM_003354711.1	396786	SLC9A4	36.2825	7.77211	28.5104	9.31963574091199e-08	6.59277935745996e-05
XM_003133041.3	100511475	LOC100511475	17.434	7.2407	10.1933	0.00140952	0.043144
XM_003127015.1	397307	CEBPA	12.6433	2.81781	9.82547	0.00172112	0.0485524
NM_001123110.1	100144501	EFNA1	19.1619	6.73162	12.4303	0.000422418	0.0215717
XM_003130220.3	100524100	SEMA3E	12.1508	2.04365	10.1072	0.00147691	0.0444421
NM_001044607.1	733679	ECH1	14.3699	2.53706	11.8329	0.000581947	0.0256702
XM_003124042.3	100520236	LOC100520236	17.6188	3.67984	13.939	0.000188842	0.0131638
XM_003482938.1	100739739	LOC100739739	59.2342	9.09578	50.1384	1.43274281327876e-12	9.64980687948961e-09
NM_001048070.1	474165	HN1L	17.0638	2.87621	14.1876	0.000165458	0.0118806
XM_003126560.2	100524622	LOC100524622	12.561	2.5029	10.0581	0.00151679	0.0451258
XM_003481340.1	100736636	LOC100736636	12.8023	2.47115	10.3311	0.00130807	0.0408906
XM_003483466.1	100738456	LOC100738456	15.5019	3.04591	12.456	0.000416661	0.0213513
XM_003126204.1	100156765	COPZ1	16.5509	4.13243	12.4185	0.000425109	0.0215717
XM_003129119.2	100512296	LOC100512296	52.5556	15.8526	36.703	1.37569278191307e-09	2.09842503971449e-06
XM_003356342.2	100622916	LOC100622916	19.7633	6.76558	12.9977	0.000311867	0.0183847
XM_003133935.1	100511788	LOC100511788	17.7305	4.80226	12.9282	0.000323667	0.0188477
XM_003480595.1	100737979	LOC100737979	24.9597	3.75691	21.2028	4.131642206473e-06	0.00105219
XM_003481031.1	100520426	LOC100520426	18.5923	3.35841	15.2339	9.49841405692986e-05	0.00812693
XM_003126035.3	100525990	LOC100525990	12.4324	0.878952	11.5534	0.000676251	0.0270991
XM_003128049.2	100514239	LOC100514239	11.3558	1.20731	10.1485	0.00144422	0.0437156
NM_001044575.2	733641	IDH3B	17.0359	3.22256	13.8133	0.0002019	0.0136885
XM_003359868.2	100621622	LOC100621622	12.3468	0.792585	11.5542	0.00067595	0.0270991
XM_003132296.3	100519870	PSMD6	12.9382	2.96007	9.97809	0.00158414	0.0459833
XM_003481028.1	100626661	LOC100626661	15.8982	3.28101	12.6172	0.000382222	0.0203923
NM_001190189.1	100154310	SLC25A1	13.8863	2.17776	11.7085	0.000622152	0.0261742
NM_001243574.1	100627341	ACAD8	17.7457	3.65029	14.0954	0.000173765	0.012338
XM_003481569.1	100525991	LMBR1L	18.4471	5.61074	12.8363	0.000339951	0.0192672
NM_001122986.2	733658	LOC733658	22.7897	5.04104	17.7486	2.52097203026214e-05	0.00329798
NM_214201.1	397403	GPX1	35.5425	9.41408	26.1284	3.19454138586472e-07	0.000156451
XM_003130472.2	100524641	LOC100524641	12.2922	2.4119	9.88034	0.00167054	0.0477848
XM_003357464.1	100516821	HDAC9	12.1304	2.25014	9.88031	0.00167057	0.0477848
XM_001929410.2	100157156	ATP5B	28.2523	7.89494	20.3574	6.42439411491225e-06	0.00133376
XM_003480667.1	100626654	LOC100626654	13.2021	2.52404	10.678	0.00108416	0.0362328
XM_003133565.2	100521161	PLCL1	13.3846	1.33569	12.0489	0.000518229	0.02443
NM_001101028.1	100113422	ACOX1	15.4074	2.92105	12.4864	0.000409926	0.021334
XM_003354284.1	100627041	LOC100627041	12.5492	2.37376	10.1755	0.00142321	0.0432856
XM_003122404.2	100515296	LOC100515296	30.3904	8.85777	21.5326	3.47864246874607e-06	0.000959576
XM_003481570.1	100125553	LOC100125553	21.6679	3.45781	18.21	1.97832766013484e-05	0.00279141
XM_003124033.3	100518652	LOC100518652	13.885	2.35173	11.5332	0.000683633	0.0272583
XM_003133109.3	100521870	OGDHL	12.8012	1.02197	11.7792	0.000598953	0.0259655
NM_214439.1	404696	HYAL3	12.3965	2.15397	10.2425	0.00137241	0.042279
XM_003354569.2	100626661	LOC100626661	15.8982	3.28101	12.6172	0.000382222	0.0203923
XM_003122991.3	100523423	LOC100523423	14.1259	2.56912	11.5568	0.000675013	0.0270991
NM_214397.1	397690	DLST	31.6444	6.43908	25.2053	5.15393183242452e-07	0.000244847
XM_003125702.1	100519480	LOC100519480	14.148	2.38394	11.7641	0.000603853	0.025969
XM_003127972.1	100513158	PARS2	13.6881	2.0926	11.5955	0.000661104	0.026981
XM_003122803.3	100511244	KBTBD4	15.7915	3.30477	12.4867	0.000409851	0.021334
NM_001185167.1	100152689	SSR1	13.3099	3.18812	10.1218	0.00146528	0.044213
XM_001928354.2	100155360	LOC100155360	16.7117	3.21965	13.4921	0.000239571	0.0154588
NM_001114289.2	100135681	CXCL9	28.5824	8.32049	20.2619	6.75327957755378e-06	0.00136658
NM_001159615.1	100152077	KRT8	67.6278	23.5863	44.0414	3.21497273247928e-11	1.22811958380709e-07
XM_001927912.2	100152297	TECTB	18.9768	3.66047	15.3163	9.09262953994183e-05	0.00804024
XM_003131192.1	100521332	UNC13D	15.8591	0.778842	15.0803	0.000103033	0.00865578
XM_003135480.2	100520774	LOC100520774	15.7016	2.25216	13.4494	0.000245079	0.0156968
XM_003126946.1	100525048	LOC100525048	16.8109	2.97628	13.8346	0.000199623	0.0136317
NM_001243852.1	100511525	STT3A	14.2714	3.48989	10.7815	0.00102518	0.0355977
NM_001044617.1	733693	SLC22A7	19.4299	1.24108	18.1888	2.00051787014877e-05	0.00279141
XM_003131367.3	100514791	LOC100514791	21.2849	2.64306	18.6418	1.57720611633216e-05	0.00237202
XM_003134287.3	100512320	LOC100512320	14.9444	4.81801	10.1264	0.00146164	0.0441731
XM_001927795.4	407060	HSPA5	18.5711	5.90852	12.6626	0.000373047	0.0201847
XM_003122812.2	100513002	ACP2	14.0192	1.91242	12.1068	0.00050238	0.0239886
XM_003124533.3	100520426	LOC100520426	18.6807	3.43853	15.2421	9.45690677275346e-05	0.00812693
XM_003132226.1	100517004	LOC100517004	12.8139	0.508599	12.3053	0.000451675	0.0224283
XM_003131905.2	397390	OMC	15.9591	1.7545	14.2046	0.000163968	0.011818
NM_001244227.1	100625944	RGC32	13.5315	1.20248	12.329	0.00044597	0.0222985
NM_001243907.1	100511890	HSPA8	45.0813	10.8401	34.2412	4.8686522591268e-09	6.61093708368791e-06
XM_001926349.3	100155491	ORMDL1	18.2241	6.27461	11.9495	0.000546634	0.0246825
XM_001927440.2	100158185	LOC100158185	26.0515	6.29503	19.7564	8.79656726981981e-06	0.00155569
XM_003122683.1	100514446	LOC100514446	12.8474	2.52026	10.3271	0.00131089	0.0409118
XM_003355138.1	100153896	FLAD1	13.8522	3.11097	10.7413	0.00104772	0.0359274
XM_003355999.1	100286877	PRMT1	18.7763	5.15498	13.6213	0.000223636	0.0146936
XM_003124444.1	100517757	LOC100517757	27.8056	4.73623	23.0694	1.56258181738256e-06	0.000514574
XM_003357720.1	100511276	NOL6	19.1501	1.73024	17.4198	2.99682057584016e-05	0.00376574
XM_003356648.1	100623036	LOC100623036	14.8177	3.8432	10.9745	0.000923754	0.0329789
NM_213788.1	396687	LEAP2	53.8189	22.2786	31.5403	1.95347326092943e-08	2.3319587052345e-05
XM_003482319.1	100739812	LOC100739812	11.5648	0.882427	10.6824	0.00108162	0.0362328
XM_003481823.1	100739300	LOC100739300	12.3913	1.89095	10.5003	0.00119355	0.0382577
XM_003132757.3	100510984	LOC100510984	15.5703	3.55798	12.0123	0.000528502	0.02443
XM_003126864.2	100523064	LDHD	23.8291	2.94094	20.8882	4.86893270179589e-06	0.00114811
NM_213739.1	396558	PAQR7	19.6638	2.73087	16.933	3.87233938267117e-05	0.00448253
XM_003480846.1	100523423	LOC100523423	14.1273	2.56914	11.5581	0.000674536	0.0270991
XM_003122549.2	100515705	LOC100515705	14.6929	2.66668	12.0262	0.000524575	0.02443
XM_003354567.2	100626278	LOC100626278	12.7014	1.15331	11.5481	0.000678186	0.0270991
XM_003133679.3	100524650	LOC100524650	20.1882	3.45378	16.7344	4.29946933971914e-05	0.00465419
XM_003358455.1	100620746	LOC100620746	15.4169	1.20825	14.2087	0.000163615	0.011818
XM_003482888.1	100621855	LOC100621855	15.6751	3.28476	12.3904	0.000431556	0.0217486
XM_003131015.3	100519729	LOC100519729	29.469	5.68887	23.7801	1.07993794085104e-06	0.000400409
XM_003483067.1	100737417	TNFAIP1	14.6976	4.48417	10.2135	0.00139419	0.0428311
XM_003481166.1	100737616	LOC100737616	12.3263	1.99208	10.3342	0.00130586	0.0408885
XM_003353753.2	100626654	LOC100626654	13.2021	2.52404	10.678	0.00108416	0.0362328
XM_003131396.3	100521218	LOC100521218	11.4575	1.1624	10.2951	0.00133385	0.0413579
XM_003127209.3	100523003	LOC100523003	13.8692	3.55536	10.3138	0.00132036	0.0411401
XM_003357648.1	100623289	LOC100623289	10.9654	1.13333	9.83208	0.00171494	0.0485264
XM_001927288.3	100152209	GSTO2	48.7102	24.6254	24.0848	9.21839053424911e-07	0.000352143
XM_003131154.2	100513228	LOC100513228	14.4775	0.486056	13.9915	0.000183643	0.0128841
XM_003483502.1	100152996	SEC24C	19.7233	3.47405	16.2493	5.55314648996719e-05	0.00557994
XM_003129868.2	100520143	LOC100520143	31.9663	11.5765	20.3898	6.31670033424125e-06	0.00132581
XM_003481750.1	100737277	LOC100737277	22.0975	7.51866	14.5789	0.000134413	0.0104749
XM_003484312.1	100152283	BRD3	22.4857	1.78296	20.7027	5.36389417016281e-06	0.00123434
XM_003356482.2	100621142	LOC100621142	27.5657	6.05401	21.5117	3.51676937559997e-06	0.000959576
NM_001244382.1	100156458	GHITM	18.352	4.98053	13.3715	0.000255476	0.0159658
NM_001097461.1	100037966	SOCS2	19.3618	1.8225	17.5393	2.81424797419216e-05	0.0036319
NM_001112689.1	100127161	CIDEC	25.4936	4.09874	21.3948	3.73774499118351e-06	0.000991541
NM_001112688.1	100127160	CIDE-B	24.2013	4.25009	19.9512	7.94432461348471e-06	0.00147317
XM_003132358.1	100521991	LOC100521991	20.3218	6.7843	13.5375	0.000233843	0.0151404
NM_001048072.1	595108	ARF4	32.6394	5.2279	27.4114	1.64454684981052e-07	9.77232699944326e-05
XM_003128932.1	100512294	LOC100512294	11.2702	0.698073	10.5721	0.00114804	0.0373555
XM_003127022.3	100511084	PEPD	15.0127	2.35752	12.6552	0.000374517	0.020207
XM_003357966.1	396771	ACO	17.8437	4.63585	13.2079	0.000278775	0.016985
XM_003358038.1	100524706	LOC100524706	18.3678	3.70032	14.6675	0.000128241	0.0101215
XM_003131848.1	100515576	LOC100515576	22.5469	4.52642	18.0204	2.18545023049632e-05	0.00293958
XM_003359731.2	100625674	LOC100625674	19.8474	3.15422	16.6932	4.39385382365876e-05	0.00468841
XM_003482321.1	100739812	LOC100739812	11.5648	0.882427	10.6824	0.00108162	0.0362328
XM_003482000.1	100737469	LOC100737469	19.8786	2.68287	17.1958	3.37188270751465e-05	0.00408348
NM_001243616.1	100156362	DPH3	14.9833	3.86802	11.1153	0.000856175	0.031455
XM_003133834.2	100517616	LOC100517616	40.937	2.41527	38.5218	5.41466094183818e-10	1.29275029986387e-06
XM_003357463.1	100516821	HDAC9	13.0016	2.37017	10.6314	0.00111181	0.0368034
NM_001129952.1	397627	POFUT1	12.2227	2.21119	10.0115	0.00155568	0.0456427
NM_001243468.1	100154019	CD5L	13.7454	2.11211	11.6333	0.000647809	0.0267817
XM_003126479.3	100518837	LOC100518837	16.0938	0.121192	15.9726	6.42645331058178e-05	0.00601692
XM_003127577.2	100525583	LOC100525583	12.0325	1.72821	10.3043	0.00132719	0.0412855
XM_003355209.1	100155404	LOC100155404	30.4074	4.11382	26.2936	2.93258748507164e-07	0.000147401
NM_001044578.1	733645	GRN	24.1672	3.96188	20.2054	6.95580615739377e-06	0.00136965
NM_001243707.1	100158127	CNDP2	20.9915	3.38854	17.6029	2.72167758597064e-05	0.00353633
NM_001113013.1	396593	PLA2G7	28.5283	3.78859	24.7397	6.56179602320783e-07	0.000280115
NM_001044585.1	733654	CTH	14.0634	2.36921	11.6941	0.000626971	0.026319
XM_003359592.1	100155491	ORMDL1	17.7802	6.27069	11.5095	0.000692417	0.0274381
NM_001184755.1	100431100	FTSJ1	20.0767	3.43889	16.6378	4.52409022121403e-05	0.00480056
XM_003131295.1	100514364	LOC100514364	12.5414	0.550589	11.9908	0.000534646	0.02443
XM_003353565.2	100516776	LOC100516776	30.1307	7.87184	22.2589	2.38256446238871e-06	0.000711047
XM_003481948.1	100738870	LOC100738870	41.0118	9.7742	31.2376	2.28300049975871e-08	2.56501820855244e-05
NM_001163408.1	100302502	SELT	16.9149	5.11257	11.8023	0.000591565	0.0259149
NM_001244556.1	100514707	AIMP2	13.3468	2.74933	10.5975	0.00113243	0.037164
NM_001185132.1	100154219	LTA4H	16.4449	6.58504	9.85988	0.00168922	0.0480121
XM_003483983.1	100739855	LOC100739855	11.0101	0.522304	10.4878	0.00120164	0.0384443
XM_003480521.1	100621472	LOC100621472	19.2445	2.06876	17.1757	3.40765831023937e-05	0.00409348
XM_003127002.1	100522678	LOC100522678	23.945	5.19038	18.7546	1.48664351855565e-05	0.00225356
NM_001244476.1	397257	PNOC	24.2468	5.96219	18.2846	1.90239870956344e-05	0.00273688
XM_003483555.1	100152688	XPNPEP1	13.0464	1.2731	11.7733	0.000600877	0.0259655
XM_003481768.1	100153630	CSRP2	11.6908	1.47819	10.2126	0.00139481	0.0428311
XM_003134232.2	100526021	LOC100526021	18.3016	5.61465	12.6869	0.000368218	0.020037
XM_003128042.1	100512476	PRDX1	23.2166	6.41081	16.8057	4.14077508783528e-05	0.00462508
XM_003123370.2	100515361	LOC100515361	25.0479	5.82945	19.2185	1.16578943576418e-05	0.00191953
XM_001927549.2	100156765	COPZ1	16.5509	4.13243	12.4185	0.000425109	0.0215717
XM_001929375.3	100153896	FLAD1	13.8643	3.11518	10.7491	0.00104331	0.0359049
XM_003123371.3	100515528	LOC100515528	14.8805	2.52376	12.3567	0.000439405	0.0220279
XM_003355375.1	100127131	LOC100127131	22.4844	2.52577	19.9586	7.91360389640339e-06	0.00147317
NM_001244149.1	100512312	COPS3	21.8614	5.12758	16.7338	4.30067976896487e-05	0.00465419
XM_003130678.1	100511276	NOL6	15.5883	1.73726	13.8511	0.000197884	0.0136317
NM_213785.1	396677	LOC396677	34.6124	15.6376	18.9748	1.32456110322199e-05	0.00205684
XM_003124605.1	100521260	LOC100521260	17.2386	2.50969	14.729	0.000124125	0.00988676
XM_003481798.1	100738166	LOC100738166	16.7913	2.76388	14.0275	0.000180161	0.0126977
NM_001244557.1	100514707	AIMP2	13.3468	2.74933	10.5975	0.00113243	0.037164
XM_003480518.1	100738731	LOC100738731	28.5881	14.1282	14.4598	0.000143182	0.0108173
XM_003131408.1	100524706	LOC100524706	16.5056	4.01924	12.4864	0.000409924	0.021334
XM_003127682.1	100516807	LOC100516807	17.3775	2.11509	15.2624	9.35604439908921e-05	0.00808599
XM_001927658.3	100154755	LOC100154755	22.6641	1.65055	21.0135	4.56051927399947e-06	0.00110794
XM_003121615.1	100525797	LOC100525797	29.0766	9.0313	20.0453	7.56278730207338e-06	0.00145908
XM_003126889.3	100512659	LOC100512659	11.6922	1.63107	10.0611	0.00151429	0.0451217
NM_214127.2	100154319	SOD2	17.9286	6.48366	11.4449	0.000716888	0.0278194
XM_003482948.1	100739290	LOC100739290	11.3251	0.701906	10.6232	0.00111676	0.0368512
XM_003132411.3	100518399	LOC100518399	23.5024	4.97621	18.5261	1.67589480010166e-05	0.00248136
XM_001926778.1	100154285	LOC100154285	13.9951	2.11269	11.8824	0.000566674	0.0252885
NM_001139476.1	100196906	DAZAP2	19.363	3.96187	15.4011	8.69384100353754e-05	0.00775946
NM_213973.1	397028	HSP90AA1	36.2284	9.46293	26.7654	2.29709508303699e-07	0.00011858
NM_214233.1	397463	GLRX	22.8224	5.90591	16.9165	3.90602619498859e-05	0.00449428
XM_003132180.1	100520587	LOC100520587	19.5752	3.48877	16.0864	6.05155784252354e-05	0.00577924
XM_003482652.1	100628005	LOC100628005	14.4229	2.63541	11.7875	0.000596298	0.0259655
XM_003481817.1	100737013	LOC100737013	20.4143	6.03581	14.3785	0.000149503	0.0110251
NM_001123140.1	100144465	MRPS18B	13.935	2.52296	11.412	0.000729712	0.0280433
XM_003127795.1	100512288	SF3A3	14.4787	2.36883	12.1098	0.000501564	0.0239886
XM_003128658.1	100156930	LOC100156930	18.0404	5.27131	12.7691	0.000352388	0.0193966
XM_003134980.3	100525970	LOC100525970	17.3523	6.47327	10.879	0.000972613	0.0342058
XM_003483938.1	100739269	LOC100739269	15.9658	3.17292	12.7929	0.000347933	0.0193966
XM_003354001.2	100623769	LOC100623769	25.8792	3.33634	22.5428	2.05512438966604e-06	0.000633111
XM_003128038.1	100512476	PRDX1	23.2268	6.388	16.8388	4.06935876382519e-05	0.00462508
XM_003481099.1	100737559	LOC100737559	22.3342	5.21684	17.1174	3.51393206571293e-05	0.00414297
NM_001244383.1	100156458	GHITM	17.6662	5.17889	12.4873	0.000409723	0.021334
NM_001206441.1	733650	TAP2	13.9314	0.783696	13.1477	0.000287877	0.0173686
XM_003354105.1	100515361	LOC100515361	25.0966	5.81161	19.2849	1.12590511684996e-05	0.00188638
XM_003357294.1	100519789	CRYAB	31.1395	12.3164	18.8231	1.43421323881565e-05	0.00219148
XM_003127502.2	100525522	LOC100525522	13.5306	1.59113	11.9395	0.000549571	0.0247566
XM_003481263.1	100739228	LOC100739228	13.4102	2.99063	10.4196	0.00124684	0.0395702
XM_003356202.1	100621392	GALE	26.5594	5.02302	21.5364	3.47178004789228e-06	0.000959576
XM_001928658.2	100151845	LOC100151845	16.2986	2.92988	13.3687	0.000255852	0.0159658
XM_003357462.1	100516821	HDAC9	12.1304	2.25014	9.88031	0.00167057	0.0477848
NM_001184895.1	100151790	PMM1	29.8261	7.51654	22.3096	2.3204377529451e-06	0.000703498
XM_003483721.1	100170146	IDH1	16.18	3.20025	12.9797	0.000314879	0.0185052
XM_003121294.1	100520526	LOC100520526	20.079	4.79196	15.287	9.23502999605752e-05	0.0080543
XM_001927253.2	100157976	DRG1	18.9729	4.72795	14.245	0.000160488	0.0116552
XM_003358262.2	100623827	LOC100623827	15.5466	1.83594	13.7107	0.000213238	0.0142407
XM_003353872.1	100513002	ACP2	14.0111	1.90986	12.1013	0.000503873	0.024
NM_214407.1	399537	GPX4	18.7159	5.69491	13.021	0.000308013	0.0182138
XM_003357928.1	397653	ACTB	30.0432	7.01427	23.0289	1.59582808734182e-06	0.000516616
XM_003483155.1	100737352	LOC100737352	33.9136	14.6774	19.2362	1.1550383042791e-05	0.00191837
XM_003355743.1	100521452	KARS	22.2683	6.00423	16.264	5.5100252746354e-05	0.00557994
NM_213874.1	396894	MDH1	19.7411	5.23802	14.5031	0.000139932	0.0107724
NM_001097516.1	100048954	SDHD	24.5694	5.47267	19.0968	1.24256118229082e-05	0.00197774
NM_001078684.1	780435	LOC780435	15.3795	3.92336	11.4562	0.000712565	0.0278194
XM_003131728.2	100520269	LOC100520269	16.6811	3.76755	12.9135	0.000326216	0.0189384
XM_003355206.2	100523785	LOC100523785	13.9307	0.829245	13.1015	0.000295064	0.0176668
NM_001185135.1	100154518	ARPC3	15.432	3.95374	11.4783	0.000704152	0.0276166
NM_001128435.1	397303	LBP	22.0008	6.92616	15.0746	0.000103342	0.00865578
XM_003125293.3	100522014	LOC100522014	30.3528	6.92262	23.4301	1.29533487802647e-06	0.000466809
XM_003354180.1	100526157	LOC100526157	15.448	3.99653	11.4515	0.000714368	0.0278194
XM_003482090.1	100737897	LOC100737897	21.6176	3.42193	18.1957	1.99329211678645e-05	0.00279141
XM_003483719.1	100170146	IDH1	15.521	3.52964	11.9914	0.000534475	0.02443
NM_001005728.1	449525	HIG2	23.0639	7.78855	15.2754	9.29204538206996e-05	0.00806718
XM_003483237.1	100739335	LOC100739335	18.9902	2.43522	16.555	4.72602825342117e-05	0.00498713
NM_213966.1	397017	LCTHIO	14.4499	4.05395	10.3959	0.00126292	0.03978
XM_003132179.1	100520587	LOC100520587	19.5261	3.41029	16.1158	5.95834246379656e-05	0.00575683
XM_001925349.4	100156573	SNRPA1	21.8014	1.87647	19.9249	8.05431552020064e-06	0.00147921
XM_001925393.2	100152596	VPS52	12.2063	1.27422	10.9321	0.000945142	0.0336795
XM_001924268.2	100157758	EIF2B5	10.5197	0.464643	10.0551	0.00151929	0.0451297
XM_003123191.2	100519412	LOC100519412	16.0543	3.2813	12.773	0.000351664	0.0193966
XM_003122500.3	100521064	LOC100521064	20.2322	3.49243	16.7397	4.28733157810113e-05	0.00465419
XM_003482162.1	100738270	LOC100738270	14.351	1.39108	12.96	0.000318223	0.0186444
XM_001925433.1	397655	RAN	19.4529	5.84014	13.6127	0.000224657	0.0146936
XM_003133180.3	100152688	XPNPEP1	13.0464	1.2731	11.7733	0.000600877	0.0259655
XM_003483218.1	100739864	LOC100739864	22.5092	3.62721	18.882	1.3906054437518e-05	0.00214198
XM_003135011.2	100526026	LOC100526026	14.7769	1.90997	12.8669	0.000334438	0.0192325
NM_001143708.1	100233182	GK	17.5497	6.11482	11.4349	0.000720791	0.0278194
XM_003128041.1	100512476	PRDX1	22.9193	6.4203	16.499	4.8676367257805e-05	0.00508043
XM_003360390.1	100155098	LOC100155098	15.4099	4.82032	10.5896	0.00113726	0.0371947
NM_001244377.1	100514336	PTPMT1	24.3703	9.39788	14.9725	0.000109092	0.00902018
XM_003122798.2	100525679	LOC100525679	39.3396	18.3479	20.9918	4.61260061379587e-06	0.00110794
NM_001244404.1	100153256	PPP6C	14.145	4.06981	10.0751	0.00150283	0.0449728
NM_001164510.1	100156347	SLC25A25	23.5502	6.83918	16.711	4.35269974999875e-05	0.00467059
XM_003134087.1	100516405	GABRG2	36.4145	7.41437	29.0002	7.23723609930005e-08	5.52924837986524e-05
XM_003484101.1	100737045	LOC100737045	13.1522	2.09196	11.0603	0.000881976	0.0318445
XM_003128065.1	100517766	LOC100517766	15.2737	1.91051	13.3632	0.000256609	0.0159658
XM_003480842.1	100738590	LOC100738590	27.6894	7.03364	20.6558	5.49709876307425e-06	0.00124994
XM_001924419.2	100156015	LOC100156015	15.2421	3.45859	11.7835	0.00059759	0.0259655
XM_003481471.1	100738895	LOC100738895	12.3325	0.668298	11.6642	0.000637127	0.0265702
XM_001929074.2	100156930	LOC100156930	18.0381	5.26574	12.7724	0.000351773	0.0193966
XM_001928557.2	100157763	LOC100157763	18.4155	6.39527	12.0203	0.000526248	0.02443
XM_003131141.3	100526132	LOC100526132	14.4256	2.68869	11.7369	0.00061274	0.0259963
XM_003483617.1	100512817	ODZ1	12.845	0.789514	12.0555	0.000516393	0.0244136
NM_001244121.1	100135677	DEGS1	18.2376	6.47658	11.761	0.000604837	0.025969
XM_003127991.3	100517534	LOC100517534	18.075	6.24165	11.8333	0.000581805	0.0256702
XM_003354272.1	100623801	P4HA2	18.8779	3.8194	15.0585	0.000104232	0.00865578
XM_001927577.2	100154266	ABHD4	16.1059	3.28837	12.8176	0.000343382	0.0193582
XM_001928213.2	100152414	PHF7	12.0354	1.44473	10.5907	0.00113659	0.0371947
XM_003360301.2	100628142	LOC100628142	24.1927	10.7545	13.4382	0.000246547	0.0156968
NM_001078670.1	780415	LOC780415	13.7371	2.47204	11.265	0.000789806	0.0298128
XM_003134336.1	100512637	LOC100512637	16.7089	5.59398	11.1149	0.000856368	0.031455
XM_003484097.1	100738608	LOC100738608	15.0802	3.53003	11.5501	0.00067745	0.0270991
XM_003121089.1	100513634	BRP44L	22.6932	4.85816	17.835	2.40907790334255e-05	0.00319537
XM_003358419.1	100154579	C3orf75	21.931	2.79931	19.1316	1.22005632746669e-05	0.00197774
XM_003130612.1	100511035	LOC100511035	14.4505	4.19645	10.254	0.00136388	0.0421888
XM_003124487.1	100525281	HSD3B7	16.4369	6.61396	9.82294	0.00172348	0.0485524
NM_001099923.1	396646	MYD88	40.7258	10.5217	30.2042	3.88875261991828e-08	3.71375875202196e-05
NM_001243292.1	100151831	IMP3	15.4018	3.58076	11.821	0.000585661	0.0257745
XM_003481634.1	100514459	LOC100514459	12.3796	1.70251	10.6771	0.00108472	0.0362328
XM_003123992.2	100524488	LOC100524488	22.7942	3.01924	19.775	8.71155961457148e-06	0.00155505
XM_003481098.1	100737559	LOC100737559	22.3342	5.21684	17.1174	3.51393206571293e-05	0.00414297
XM_003480765.1	100739130	LOC100739130	16.6804	0.92728	15.7531	7.21686325190207e-05	0.00659532
XM_003130194.2	100516821	HDAC9	13.0016	2.37017	10.6314	0.00111181	0.0368034
XM_003128543.1	100519262	LOC100519262	13.8954	1.22372	12.6717	0.000371228	0.0201433
XM_001928070.2	100155023	LOC100155023	15.111	4.10348	11.0075	0.000907437	0.0325179
XM_003356316.1	100512288	SF3A3	14.2678	2.22879	12.039	0.000520996	0.02443
NM_214330.1	397602	GPI	13.6348	2.14878	11.4861	0.000701202	0.0275575
NM_001142839.1	100217390	TNFRSF12A	49.8788	20.7221	29.1567	6.67555740685444e-08	5.52924837986524e-05
XM_003357844.2	100621855	LOC100621855	15.2531	3.25051	12.0026	0.000531255	0.02443
NM_001011727.1	497050	AHCY	13.0231	2.38088	10.6422	0.00110536	0.036781
NM_001123198.1	100125380	ST7	12.9054	2.40546	10.4999	0.0011938	0.0382577
XM_003480778.1	100739748	LOC100739748	11.4299	0.807598	10.6223	0.00111729	0.0368512
NM_001244509.1	100525557	FIBP	15.1948	1.57954	13.6153	0.00022435	0.0146936
XM_003126322.3	100519091	LOC100519091	12.713	2.16906	10.5439	0.00116571	0.0377375
XM_003481864.1	100738209	LOC100738209	12.1469	1.85122	10.2957	0.0013334	0.0413579
XM_003354500.1	100626099	LOC100626099	25.185	5.31722	19.8678	8.29857398521039e-06	0.00150955
NM_001001630.1	414386	PDZD11	15.6291	4.13165	11.4974	0.000696933	0.0275029
XM_003126264.3	100519773	PA2G4	12.408	2.53063	9.87737	0.00167324	0.0477848
XM_003356476.2	100627844	LOC100627844	26.1538	5.7516	20.4022	6.27570262468069e-06	0.00132581
NM_001100196.1	100101929	EIF4A1	19.2145	4.7464	14.4681	0.000142556	0.0108173
XM_001928193.4	100152996	SEC24C	19.7233	3.47405	16.2493	5.55314648996719e-05	0.00557994
XM_003356844.1	100621287	LOC100621287	32.5193	7.35169	25.1676	5.2558712759776e-07	0.000244847
NM_213927.1	396967	GOT1	16.6887	0.821207	15.8675	6.79362674715911e-05	0.00629895
XM_003130093.3	100522091	GUCY1A2	13.5461	2.50012	11.046	0.000888781	0.0320297
XM_003122352.2	100516352	LOC100516352	16.5468	5.78258	10.7642	0.00103481	0.0356767
XM_003359369.1	100627133	LOC100627133	19.586	2.33513	17.2508	3.27553870482777e-05	0.00405452
XM_003354990.2	100621539	LOC100621539	20.9518	1.2472	19.7046	9.03812150132577e-06	0.00157924
XM_003133075.3	100516698	TTC18	12.8463	0.726814	12.1195	0.000498984	0.0239462
NM_001097416.1	396893	MX2	21.2113	10.5348	10.6764	0.00108509	0.0362328
NM_214134.1	397249	EPO	23.0778	11.262	11.8159	0.000587283	0.0257865
NM_001044612.1	733686	TUBB2A	13.5033	3.32665	10.1766	0.00142232	0.0432856
NM_214358.1	397645	SAT1	14.0281	2.96613	11.062	0.000881148	0.0318445
XM_003133100.2	100517243	LOC100517243	12.8384	1.58984	11.2486	0.000796841	0.0299011
NM_214130.1	397243	CYSLT2	13.0716	0.769845	12.3018	0.000452521	0.0224283
XM_003481415.1	100154856	LOC100154856	12.8356	2.42266	10.413	0.00125133	0.0395702
NM_001134355.1	100174963	ARPC1A	19.2492	5.1329	14.1163	0.000171844	0.0122471
XM_003132181.1	100520587	LOC100520587	19.5574	3.43322	16.1241	5.93230839311953e-05	0.00575683
NM_001243811.1	100511070	HOMER1	15.5556	4.28636	11.2693	0.000788003	0.0298037
XM_001927335.3	100154856	LOC100154856	12.8356	2.42266	10.413	0.00125133	0.0395702
NM_001123220.1	100142689	CREB3	15.2959	3.03682	12.2591	0.000462996	0.0226749
XM_003128619.2	100521100	LOC100521100	12.0519	1.41747	10.6345	0.00110999	0.0368034
NM_001103211.1	100125343	SNCG	24.8843	6.88511	17.9992	2.20997102654552e-05	0.00295178
XM_003353794.1	100623923	LOC100623923	11.3035	1.50782	9.79568	0.00174922	0.0489168
XM_003360323.1	100623679	LOC100623679	22.9238	5.73145	17.1923	3.37795319179657e-05	0.00408348
NM_001044544.1	733594	TUBA1B	17.2553	4.11016	13.1452	0.000288264	0.0173686
XM_003480851.1	100737815	LOC100737815	15.7555	3.52705	12.2284	0.000470664	0.0228745
XM_003359343.1	100627227	LOC100627227	30.7838	3.48095	27.3028	1.73957653393231e-07	9.77232699944326e-05
XM_003127946.1	397566	PGM1	26.3648	4.25859	22.1062	2.57976924344927e-06	0.000758055
XM_003128016.3	100523742	LOC100523742	26.0327	5.0525	20.9802	4.64056592852646e-06	0.00110794
NM_001167649.1	100312973	HSD17B2	29.4679	12.7395	16.7284	4.31304641969055e-05	0.00465419
XM_003353758.1	100519350	LOC100519350	13.1801	2.50335	10.6767	0.00108491	0.0362328
XM_003482239.1	100156967	LOC100156967	22.0401	5.2248	16.8153	4.11989309230254e-05	0.00462508
XM_003480781.1	100737135	LOC100737135	28.4792	8.66572	19.8135	8.53769251329961e-06	0.0015384
XM_001929558.1	100152215	CDKN1A	52.0734	22.5524	29.521	5.53152623705699e-08	4.80237050580857e-05
XM_003123453.2	100523720	ILVBL	15.9966	2.07138	13.9253	0.000190224	0.0132119
NM_001243370.1	100628074	RANGRF	17.5524	2.82191	14.7305	0.000124024	0.00988676
XM_003124606.1	100521260	LOC100521260	17.2386	2.50969	14.729	0.000124125	0.00988676
XM_003481815.1	100736819	LOC100736819	19.814	8.28693	11.5271	0.000685886	0.0272583
XM_003480931.1	100514155	IK	20.5505	3.76219	16.7883	4.17900804212668e-05	0.00464064
XM_003133742.3	100511841	UGT1A3	36.95	15.6259	21.3241	3.8782974780549e-06	0.00100102
XM_003482240.1	100156967	LOC100156967	22.0401	5.2248	16.8153	4.11989309230254e-05	0.00462508
XM_003123476.1	100512765	C2H19orf42	13.8245	2.6415	11.183	0.0008255	0.0306752
XM_003131543.3	100521291	LOC100521291	15.5284	0.956469	14.5719	0.000134912	0.0104749
XM_003354697.2	100622812	LOC100622812	59.8406	32.7891	27.0514	1.98112198313005e-07	0.000108113
NM_001144926.2	497065	PSMB6	13.3726	3.49557	9.87699	0.00167358	0.0477848
NM_214364.1	397651	VDAC1P5	17.3703	3.1119	14.2584	0.000159344	0.0116163
XM_003483189.1	100505460	MANF	17.975	6.9596	11.0154	0.000903564	0.03244
XM_003129258.1	100517665	LOC100517665	18.0716	6.79979	11.2718	0.000786929	0.0298037
XM_003483181.1	100620512	LOC100620512	14.033	0.94847	13.0845	0.000297745	0.0177717
XM_003358591.1	100514874	LOC100514874	16.9576	4.1207	12.8369	0.000339842	0.0192672
XM_003359825.1	100516405	GABRG2	36.4145	7.41437	29.0002	7.23723609930005e-08	5.52924837986524e-05
XM_003483720.1	100170146	IDH1	15.521	3.52964	11.9914	0.000534475	0.02443
NM_001168419.1	100316849	ZFP36	30.3604	16.7539	13.6065	0.000225405	0.0146936
XM_003480660.1	100739347	LOC100739347	26.4313	4.35597	22.0754	2.62152001317961e-06	0.000758652
XM_003128657.1	100156930	LOC100156930	18.0404	5.27131	12.7691	0.000352388	0.0193966
XM_003358202.1	100515576	LOC100515576	22.5859	4.5318	18.054	2.14721513717153e-05	0.00290864
XM_003360048.2	100626091	LOC100626091	23.4083	5.91366	17.4946	2.88124361319531e-05	0.00364449
XM_003483346.1	100738012	LOC100738012	27.0656	13.2608	13.8048	0.000202819	0.0136885
NM_214019.1	397082	DHRS4	36.1937	12.0776	24.1162	9.06962875468764e-07	0.000352143
XM_003126856.2	100521452	KARS	22.2683	6.00423	16.264	5.5100252746354e-05	0.00557994
NM_001044581.1	733649	TAP1	14.5873	1.53448	13.0528	0.00030283	0.0179629
XM_001925061.1	100154617	LOC100154617	41.4386	22.9833	18.4554	1.73930300869651e-05	0.00255212
XM_003128039.1	100512476	PRDX1	22.9193	6.4203	16.499	4.8676367257805e-05	0.00508043
NM_001243528.1	100155047	MRPL15	18.5147	5.88049	12.6342	0.000378744	0.0203203
XM_003129127.1	100514171	LOC100514171	28.6132	8.3637	20.2495	6.79714183660085e-06	0.00136658
XM_003358715.1	100627224	ECE2	14.6213	1.90899	12.7123	0.000363261	0.0198805
XM_003130436.3	100515848	LOC100515848	15.2478	3.59268	11.6551	0.000640261	0.0266427
XM_003358153.1	100626208	NLE1	17.0082	2.51188	14.4963	0.000140436	0.0107724
NM_001244543.1	100513388	DDX56	17.4947	2.78102	14.7136	0.000125138	0.00991759
XM_001926938.4	100152525	LOC100152525	14.8666	2.83896	12.0276	0.000524176	0.02443
NM_001123083.1	100142666	BCKDHA	18.1812	2.96902	15.2121	9.60840071531077e-05	0.00815646
NM_001031788.1	595117	RAB11A	14.4433	3.34171	11.1015	0.00086256	0.0315054
XM_003132177.1	100520587	LOC100520587	19.5029	3.40301	16.0999	6.00879906665908e-05	0.00576724
XM_003481476.1	100157002	SEC22B	13.1579	1.65806	11.4998	0.000696029	0.0275029
NM_001244153.1	397039	MDH2	18.9542	3.66707	15.2871	9.23429201037385e-05	0.0080543
XM_003127945.2	397566	PGM1	22.3703	3.82809	18.5422	1.6618285812342e-05	0.00247976
NM_001244488.1	100512538	NUCB1	14.7042	3.10056	11.6036	0.000658238	0.0269215
XM_003357604.1	100624161	LOC100624161	18.333	5.63512	12.6979	0.000366066	0.0199768
XM_003133583.3	100525788	LOC100525788	11.1956	0.272902	10.9227	0.000949937	0.0337873
XM_003482120.1	100739771	LOC100739771	24.679	4.10156	20.5774	5.72667468656807e-06	0.00125663
XM_003481733.1	100738422	LOC100738422	27.0406	6.31467	20.7259	5.29947164396027e-06	0.00123434
XM_003353781.1	100515705	LOC100515705	14.6929	2.66668	12.0262	0.000524575	0.02443
XM_003356001.1	100286877	PRMT1	18.7763	5.15498	13.6213	0.000223636	0.0146936
XM_003128040.1	100512476	PRDX1	23.2287	6.38742	16.8413	4.06391770777503e-05	0.00462508
NM_001244459.1	100625739	SGK1	21.6806	10.9365	10.7441	0.00104615	0.0359274
XM_003123324.1	100520362	LOC100520362	12.241	2.17761	10.0633	0.00151249	0.0451217
NM_001099932.1	407608	PGK1	16.6805	6.09487	10.5856	0.00113973	0.0372116
NM_001243376.1	100152942	GNPNAT1	13.9776	3.79864	10.179	0.0014205	0.0432856
XM_001925833.4	100157703	IPO4	15.1961	0.872123	14.3239	0.000153896	0.0113054
XM_003359985.2	100513892	LOC100513892	24.5358	6.38003	18.1558	2.03546757109319e-05	0.00281721
XM_003355907.1	100623625	LOC100623625	30.6151	17.173	13.4421	0.000246045	0.0156968
XM_003126320.1	100518554	LOC100518554	19.9115	2.83004	17.0814	3.58106687305959e-05	0.00419622
NM_001144843.1	497061	ADAMTS1	27.6644	12.6018	15.0626	0.000104002	0.00865578
NM_001123104.1	100141405	CTSZ	14.5264	2.26586	12.2605	0.000462636	0.0226749
XM_003132178.1	100520587	LOC100520587	19.5261	3.41029	16.1158	5.95834246379656e-05	0.00575683
XM_003483014.1	397571	COL1A1	19.7394	5.89533	13.844	0.000198627	0.0136317
NM_001011507.1	494565	LAMP-1	13.5967	1.13378	12.4629	0.000415108	0.0213513
NM_214405.1	399535	MUT	14.725	2.97293	11.7521	0.000607757	0.025969
NM_001123113.1	100144486	FOS	25.8915	5.86679	20.0247	7.6449019190683e-06	0.00146018
NM_001185186.1	100153171	DNPEP	11.7099	1.0092	10.7007	0.00107092	0.0362328
XM_001929196.2	100154911	LOC100154911	10.9491	0.923821	10.0253	0.00154405	0.0456047
XM_003481158.1	100736718	LOC100736718	24.6582	11.2644	13.3938	0.000252459	0.0159141
XM_003126528.2	100157341	COPS7A	12.6717	1.79676	10.875	0.000974736	0.0342058
XM_003481571.1	100125553	LOC100125553	21.608	3.4208	18.1872	2.00221868679185e-05	0.00279141
NM_001128487.1	100158236	GPR39	15.6485	1.81587	13.8326	0.000199836	0.0136317
NM_001110419.1	397444	GNMT	17.6211	2.07014	15.551	8.03091938382794e-05	0.0072354
XM_003124443.1	100517757	LOC100517757	27.8056	4.73623	23.0694	1.56258181738256e-06	0.000514574
XM_003132142.1	100524900	LOC100524900	50.1858	12.7622	37.4235	9.50695744350583e-10	1.81582887170961e-06
XM_001927635.2	100155406	LOC100155406	14.7268	2.57199	12.1549	0.000489603	0.0235552
XM_003483435.1	100157055	LOC100157055	12.6013	2.73859	9.86274	0.0016866	0.0480121
NM_001078666.1	780410	PSEN2	28.703	5.86905	22.834	1.76614345392956e-06	0.000562222
XM_003354090.2	100624460	LOC100624460	18.5963	6.74282	11.8534	0.000575549	0.0255651
XM_003354614.1	100520369	LOC100520369	12.242	2.23958	10.0024	0.00156335	0.0457975
XM_003134450.3	100157757	LOC100157757	14.8196	4.1583	10.6613	0.00109399	0.0364664
XM_001929262.4	100157687	LOC100157687	34.1419	4.54857	29.5933	5.32890316318202e-08	4.80237050580857e-05
XM_003130748.2	100513426	LOC100513426	23.6027	8.78663	14.8161	0.000118519	0.009592
XM_003482350.1	100739772	LOC100739772	23.4366	2.84798	20.5886	5.6933586116692e-06	0.00125663
XM_003124919.3	100511252	LOC100511252	24.6957	4.47612	20.2196	6.90433426409065e-06	0.00136965
XM_003482482.1	100739483	LOC100739483	12.6828	2.88017	9.80259	0.00174266	0.0488048
XM_003127093.3	100511329	ZNF829	21.1536	6.33655	14.8171	0.000118459	0.009592
NM_001185142.1	100157880	ATP5A1	25.1172	5.79267	19.3246	1.10277640087419e-05	0.00187393
XM_003122940.1	100526207	SAAL1	12.4701	2.71839	9.75169	0.00179158	0.0498821
XM_003482246.1	100155181	AKAP6	12.1046	0.741228	11.3633	0.000749085	0.02873
XM_003128704.2	100523620	LOC100523620	93.0525	44.1169	48.9356	2.64499533386697e-12	1.26298527192148e-08
NM_001100193.1	100101926	EIF4A3	24.9358	4.87633	20.0595	7.50690778783536e-06	0.00145908
XM_003357269.1	100524886	GRIA4	12.7479	1.64663	11.1013	0.000862686	0.0315054
NM_001122994.1	397034	OAZ1	14.7125	3.56858	11.1439	0.000843096	0.0310871
NM_001244246.1	100516080	NOP2	17.3311	2.87491	14.4562	0.000143459	0.0108173
NM_001243341.1	100628241	POLR2H	14.9025	4.39726	10.5052	0.00119037	0.0382577
XM_003133369.1	100524716	LOC100524716	14.1054	1.1533	12.9521	0.000319563	0.0186656
XM_003134862.1	100524778	LOC100524778	16.2373	4.51314	11.7242	0.000616931	0.0260541
XM_003353963.1	100623333	LOC100623333	16.6362	5.11066	11.5256	0.000686453	0.0272583
XM_003482320.1	100739812	LOC100739812	11.5648	0.882427	10.6824	0.00108162	0.0362328
NM_001123192.1	100141406	RPL7L1	14.3949	3.32023	11.0747	0.00087514	0.0318384
XM_003126297.2	100514459	LOC100514459	12.3796	1.70251	10.6771	0.00108472	0.0362328
NM_001001643.1	414427	GDI2	14.1381	2.44881	11.6893	0.000628608	0.0263299
XM_001927727.2	100155734	LOC100155734	17.8956	3.27616	14.6195	0.000131547	0.0103034
XM_003126114.3	100513730	LOC100513730	19.9245	3.46723	16.4573	4.97583048890693e-05	0.00516513
XM_003482380.1	100738638	LOC100738638	14.8102	4.40407	10.4061	0.00125597	0.0396511
NM_001244418.1	100152163	DLL4	13.7528	2.88035	10.8725	0.00097603	0.0342058
XM_003482870.1	100737759	LOC100737759	39.6075	12.2383	27.3692	1.68087726404309e-07	9.77232699944326e-05
XM_003357489.2	100524640	LOC100524640	20.4492	3.20691	17.2423	3.29032013260955e-05	0.00405452
XM_001927348.1	100154856	LOC100154856	12.8356	2.42266	10.413	0.00125133	0.0395702
NM_001097412.1	396581	HMBS	12.2699	1.46268	10.8073	0.00101102	0.0353074
NM_001244123.1	100524683	DHDDS	12.7767	1.10484	11.6719	0.000634512	0.026519
XM_003128368.2	100524445	LOC100524445	15.3288	3.14686	12.1819	0.000482555	0.0232748
XM_003353957.1	100622895	LOC100622895	14.5176	1.31282	13.2048	0.00027923	0.016985
NM_001160427.1	100301914	ARF1	34.4088	6.29408	28.1147	1.14334277601102e-07	7.53029207648641e-05
NM_001195119.1	100499564	PDIA6	17.404	4.58752	12.8165	0.000343582	0.0193582
XM_003481898.1	100286877	PRMT1	18.7763	5.15498	13.6213	0.000223636	0.0146936
NM_001244354.1	100155306	SEC61A1	18.3922	7.19103	11.2012	0.000817458	0.030495
XM_003129961.3	100524210	LOC100524210	44.7618	10.6457	34.1162	5.19183540603763e-09	6.61093708368791e-06
XM_003123337.1	100524304	LOC100524304	22.4266	4.63398	17.7926	2.46337296525567e-05	0.00324486
XM_001924196.4	100156819	LOC100156819	13.7424	2.95306	10.7893	0.00102086	0.0355162
